# Supplementary material
Source: publisher site journal article supplement (https://www.dovepress.com/article/341175)
Supplement: Supplementary file 1 [file get_supplementary_file.php]

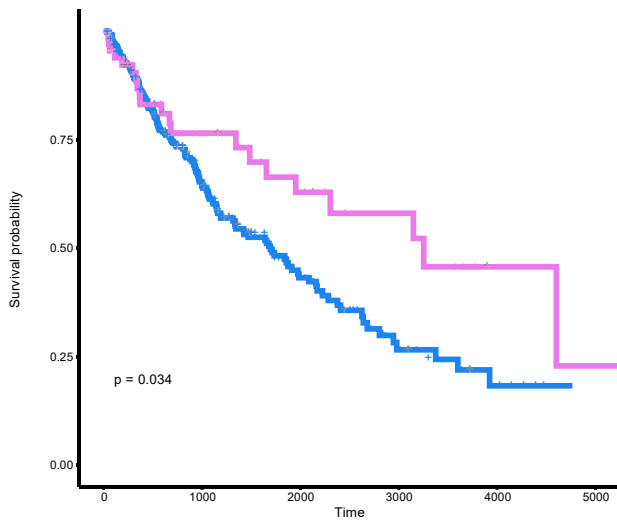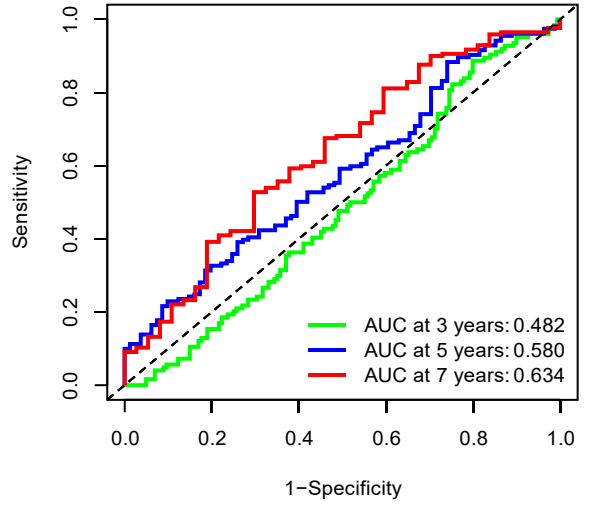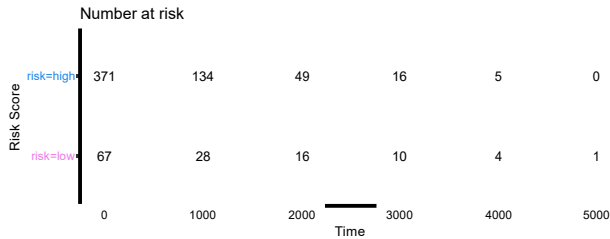

Supplementary Figure 1B

Supplementary Figure 1A

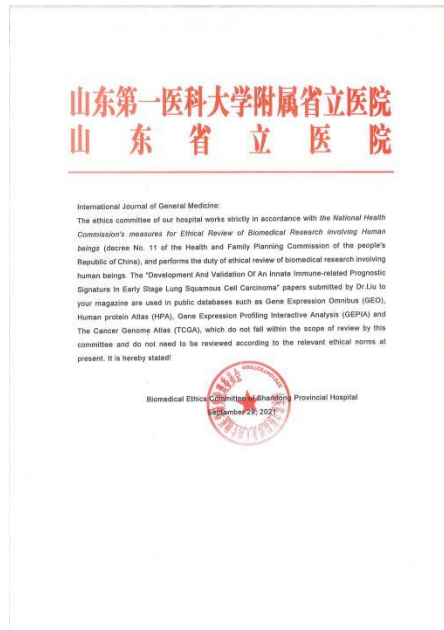

Supplementary Figure 2

Supplement figure legend:

Supplement Figure 1A: Kaplan-Meier analysis, showing that overall survival (OS) rates were significantly higher in the low- than in the high-risk group in TCGA cohort ( $P = 0.034$  by log-rank test).

Supplement Figure 1B: AUC of time-dependent ROC curves measuring the ability of the model to predict OS of TCGA cohort in 3-year, 5-year and 7-year.

Supplement Figure 2: Biomedical Ethics Committee of Shandong Provincial Hospital approved that no ethic statement
